# 1 Enhancing bioreactor arrays for automated measurements and reactive 2 control with ReaSight

3  
4 *François Bertaux*<sup>1,2 \*†</sup>, *Sebastián Sosa-Carrillo*<sup>2,1,3 \*</sup>, *Achille Fraisse*<sup>2,1</sup>, *Chetan Aditya*<sup>2,1,3</sup>, *Mariela*  
5 *Furstenheim*<sup>1</sup>, *Gregory Batt*<sup>2,1 †</sup>

- 6 1. Institut Pasteur, 28 rue du Docteur-Roux, 75015 Paris, France
- 7 2. Inria Paris, 2 rue Simone Iff, 75012 Paris, France
- 8 3. Université de Paris, 85 boulevard Saint-Germain, 75006 Paris, France

9  
10 \* These authors contributed to this work equally.

11 † Correspondence: [francois.bertaux@pasteur.fr](mailto:francois.bertaux@pasteur.fr), [gregory.batt@inria.fr](mailto:gregory.batt@inria.fr)

## 12 Abstract

13 New small-scale, low-cost bioreactors provide researchers with exquisite control of environmental  
14 parameters of microbial cultures over long durations, allowing them to perform sophisticated, high-quality  
15 quantitative experiments that are particularly useful in systems biology, synthetic biology and  
16 bioengineering. However, existing setups are limited in their automated measurement capabilities,  
17 primarily because sensitive and specific measurements require bulky, expensive, stand-alone instruments.  
18 Here, we present ReaSight, a generic and flexible strategy to enhance bioreactor arrays for automated  
19 measurements and reactive experiment control. On the hardware side, ReaSight leverages a pipetting  
20 robot for sample collection, handling and loading. On the software side, ReaSight provides a versatile  
21 instrument control architecture and a generic event system for reactive experiment control. ReaSight is  
22 ideally suited to integrate open-source, open-hardware components but can also accommodate closed-  
23 source, GUI-only components (e.g. cytometers). We use ReaSight to assemble a platform for cytometry-  
24 based characterization and reactive optogenetic control of parallel yeast continuous cultures. Using a  
25 dedicated bioreactor array, we showcase its capabilities on three applications. First, we achieve parallel  
26 real-time control of gene expression with light in different bioreactors. Second, we explore the impact of  
27 nutrient scarcity on fitness and cellular stress using well-controlled, high-information content competition  
28 assays. Third, we exploit nutrient scarcity to achieve dynamic control over the composition of a two-strain  
29 consortium. To illustrate the genericity of ReaSight, we also assemble an equivalent platform using the  
30 optogenetic-ready, open-hardware and commercially available Chi.Bio bioreactors.

## 31 Introduction

32 Small-scale, low-cost bioreactors are emerging as powerful tools for microbial systems and synthetic  
33 biology research<sup>1-4</sup>. They allow tight control of cell culture parameters (e.g. temperature, cell density,  
34 media renewal rate) over long durations (several days). These unique features enable researchers to  
35 perform sophisticated experiments and to achieve high experimental reproducibility. Examples include  
36 characterization of antibiotic resistance when drug selection pressures increases as resistance evolves<sup>1</sup>,  
37 cell-density controlled characterization of cell-cell communication synthetic circuits<sup>2</sup>, and genome-wide  
38 characterization of yeast fitness under dynamically changing temperature using a pooled knockout  
39 library<sup>3</sup>.

40 A weakness of existing small-scale, low-cost bioreactors is their limited automated measurement  
41 capabilities: in situ optical density measurements only inform about overall biomass concentration and its  
42 growth rate, and, when available<sup>2,4</sup>, fluorescence measurements suffer from low sensitivity and high  
43 background. It is often essential to also measure and follow over time key characteristics of the cultured  
44 cell population, such as gene expression levels, cellular stress levels, cell size and morphology, cell cycle  
45 progression, proportions of different genotypes or phenotypes. Researchers usually need to manually  
46 extract, process and measure culture samples to run them through more sensitive and specialized  
47 instruments (e.g. a cytometer, a microscope, a sequencer). Manual interventions are usually tedious,  
48 error-prone and strongly constrains the available temporal resolution and scope (i.e. no time-points during  
49 night-time). It also impedes the dynamic adaptation of culture conditions in response to such  
50 measurements. Such *reactive experiment control* is currently gaining interest in systems and synthetic  
51 biology. It can be used to either maintain a certain state of the population (*external feedback control*) or  
52 to maximize the value of the experiment (*reactive experiment design*). For example, external feedback  
53 control can be used to disentangle complex cellular couplings and signaling pathway regulations<sup>5-8</sup>, to  
54 steer the composition of microbial consortia<sup>9</sup> or to optimize industrial bioproduction<sup>10</sup>. Reactive  
55 experiment design can be especially useful in the context of long and uncertain experiments such as  
56 artificial evolution experiments<sup>11</sup>. It is also useful to accelerate model-based characterization of biological  
57 systems by enabling real-time parameter inference and optimal experiment design<sup>12</sup>.

58 In principle, commercial robotic equipment and/or custom hardware can be used to couple a bioreactor  
59 array to a sensitive, multi-sample (typically accepting 96-well plates as input) measurement device.  
60 However, this poses tremendous challenges regarding equipment sourcing, equipment cost and software  
61 integration. When a functional platform is established, upgrade and maintenance of the corresponding  
62 hardware and software is also highly challenging. Accordingly, very few examples have been reported to  
63 date. For instance, only two groups have demonstrated automated cytometry and reactive optogenetic  
64 control of bacteria<sup>13</sup> or yeast<sup>6,7</sup> cultures, with setups limited to either a single continuous culture or  
65 multiple batch-only cultures. One group has also demonstrated automated microscopy and reactive  
66 optogenetic control of a single yeast continuous culture<sup>14</sup>.

67 Here, we present ReacSight, a generic and flexible strategy to enhance bioreactor arrays for automated  
68 measurements and reactive experiment control. We first use ReacSight to assemble a platform enabling  
69 cytometry-based characterization and reactive optogenetic control of parallel yeast continuous cultures.  
70 Importantly, we built two versions of the platform, using either a custom-made bioreactor array or the  
71 recent low-cost, open-hardware, optogenetic-ready commercially available Chi.Bio bioreactors<sup>4</sup>. We then  
72 demonstrate its usefulness on three case studies. First, we achieve parallel real-time control of gene  
73 expression with light in different bioreactors. Second, we explore the impact of nutrient scarcity on fitness  
74 and cellular stress using highly-controlled and informative competition assays. Third, we exploit nutrient  
75 scarcity and the reactive experiment control capabilities of the platform to achieve dynamic control over  
76 the composition of a two-strain consortium. To the best of our knowledge, this last application is the first  
77 of its kind.

## 78 Results

### 79 Measurement automation, platform software integration and reactive experiment control with 80 *ReacSight*

81 The *ReacSight* strategy (Figure 1, Text S1.1) to enhance bioreactor arrays for automated measurements  
82 and reactive experiment control combines hardware and software elements in a flexible and standardized  
83 manner. A pipetting robot is used to establish, in a generic fashion, a physical link between any bioreactor  
84 array and any plate-based measurement device (Figure 1, left). Bioreactor culture samples are sent to the  
85 pipetting robot through pump-controlled sampling lines attached to the robot arm (*sampling*). A key  
86 advantage of using a pipetting robot is that diverse treatment steps can be automatically performed on  
87 culture samples before measurement (*treatment*). Samples are then transferred to the measurement  
88 device by the pipetting robot (*loading*). Naturally, this requires that the measurement device can be  
89 physically positioned such that when its loading tray is open, wells of the device input plate are accessible  
90 to the robot arm. Partial access to the device input plate is not problematic because the robot can be used  
91 to wash input plate wells between measurements, allowing re-use of the same wells over time (*washing*).  
92 Importantly, if reactive experiment control is not needed or if it is not based on measurements, the robot  
93 capabilities can also be used to treat and store culture samples for one-shot offline measurements at the  
94 end of an experiment, enabling automated measurements with flexible temporal resolution and scope.

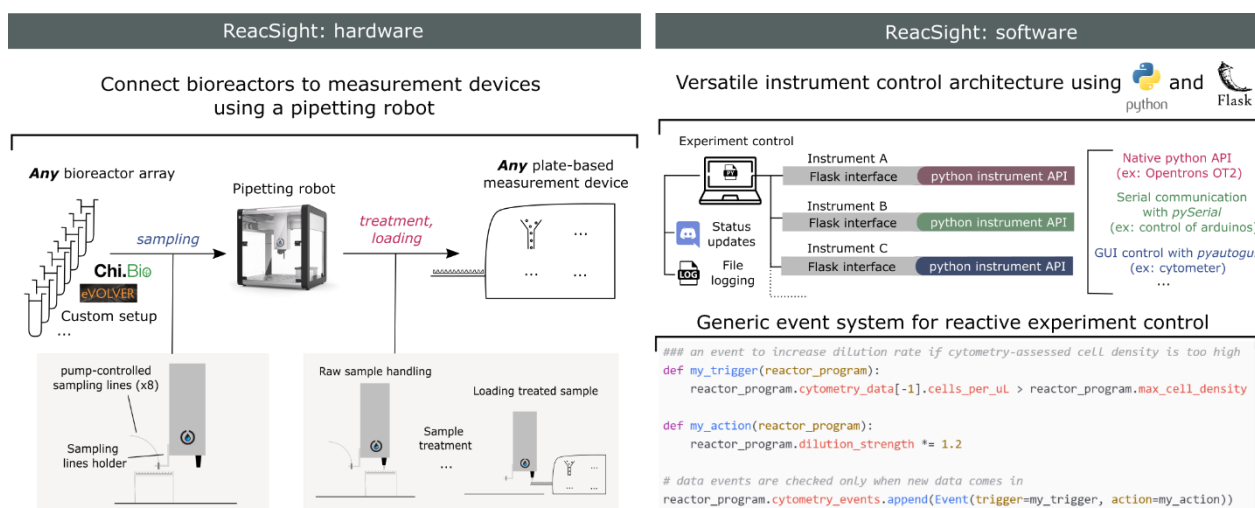

95  
96 **Figure 1. *ReacSight*: a strategy to enhance bioreactor arrays for automated measurements and reactive experiment control.** On  
97 the hardware side, *ReacSight* leverages a pipetting robot (such as the low-cost, open-source Opentrons OT-2) to create a physical  
98 link between any multi-bioreactor setup (eVOLVER, Chi.Bio, custom...) and the input of any plate-based measurement device (plate  
99 reader, cytometer, high-throughput microscope, pH-meter...). If necessary, the pipetting robot can be used to perform a treatment  
100 on bioreactor samples (dilution, fixation, extraction, purification...). If reactive  
101 experiment control is not needed, treated samples can also be stored on the robot-deck for offline measurements (the OT-2  
102 temperature module can help the conservation of temperature-sensitive samples). On the software side, *ReacSight* enables full  
103 platform integration via a versatile instrument control architecture based on Python and the Python web application framework  
104 Flask. *ReacSight* software also provides a generic event system to enable reactive experiment control. Example code for a simple  
105 use case of reactive experiment control is shown. Experiment control can also inform remote users about the status of the  
106 experiment using Discord webhooks and generates an exhaustive log file.

107 *ReacSight* also provide a solution to several software challenges that should be addressed to unlock  
108 automated measurements and reactive experiment control of multi-bioreactors (Figure 1, right). First,  
109 programmatic control of all instruments of the platform (bioreactors, pipetting robot, measurement  
110 device) is required. Second, a single computer should communicate with all instruments to orchestrate

111 the whole experiment. ReaSight combines the versatility and power of the python programming language  
112 with the genericity and scalability of the Flask web-application framework to address both challenges.  
113 Indeed, Python is ideally suited to easily build APIs to control various instruments: there exist well-  
114 established, open-source libraries for the control of micro-controllers (such as arduinos), and even for the  
115 'clicking'-based control of GUI-only software driving closed-source instruments lacking APIs (pyautogui).  
116 Importantly, the open-source, low-cost pipetting robot OT-2 (Opentrons) is shipped with a native Python  
117 API. Hamilton robots can also be controlled with a Python API<sup>15</sup>. Flask can then be used to expose all  
118 instrument APIs for simple access over the local network. The task of orchestrating the control of multiple  
119 instruments from a single computer is then essentially reduced to the simple task of sending HTTP  
120 requests, for example using the Python module requests. HTTP requests also enable user-friendly  
121 communication from the experiment to remote users using the community-level digital distribution  
122 platform Discord. This versatile instrument control architecture is a key component of ReaSight. Two  
123 other key components of ReaSight are 1) a generic object-oriented implementation of *events* (if *this*  
124 happens, do *this*) to facilitate reactive experiment control and 2) an exhaustive logging of all instrument  
125 operations into a single log file. ReaSight software as well as source files for hardware pieces are made  
126 openly available in the ReaSight Git [repository](#).

### 127 [Reactive optogenetic control and single-cell resolved characterization of yeast continuous cultures](#)

128 Our first application of the ReaSight strategy is motivated by yeast synthetic biology applications. In this  
129 context, it is critical to 1) accurately control synthetic circuits and 2) measure their output in well-defined  
130 environmental conditions and with sufficient temporal resolution and scope. Optogenetics provides an  
131 ideal way to control synthetic circuits, and bioreactor-enabled continuous cultures are ideal to exert tight  
132 control over environmental conditions for long durations. To measure circuit output in single cells,  
133 cytometry is also ideal due to high sensitivity and throughput. We thus resorted to the ReaSight strategy  
134 to assemble a fully automated experimental platform enabling reactive optogenetic control and single-cell  
135 resolved characterization of yeast continuous cultures (Figure 2A), using a benchtop cytometer as a  
136 measurement device.

137 Detailed information on the platform hardware and software is provided in Text S1.2, and we discuss here  
138 only key elements. Eight reactors are connected to the pipetting robot, meaning that each timepoint fills  
139 one row of a sampling plate. While three rows of the cytometer input plate are accessible by the robot,  
140 we use only one row, washed extensively by the robot to achieve less than 0.2% carry-over as validated  
141 using beads. We typically fit two tip boxes and two sampling plates (2 x 96 = 192 samples) on the robot  
142 deck, therefore enabling 24 timepoints for each of the 8 reactors without any human intervention. To  
143 enable reactive experiment control based on cytometry data, we developed and implemented algorithms  
144 to perform automated gating and spectral deconvolution between overlapping fluorophores (Figure 2B).

145 We first validated the performance of the platform by carrying out long-term turbidostat cultures of yeast  
146 strains constitutively expressing various fluorescent proteins from chromosomally integrated  
147 transcriptional units (Figure 2C). Distributions of fluorophore levels were unimodal and stable over time,  
148 as expected from steady growth conditions with a constitutive promoter. Distributions of mNeonGreen  
149 and mScarlet-I exactly overlapped between the single- and 3-color strains, as expected from the  
150 assumptions that expressing one or three fluorescent proteins from the strong pTDH3 promoter has  
151 negligible impact on cell physiology and that the relative positioning of transcriptional units in the 3-color  
152 strain (mCerulean first, followed by mNeonGreen and mScarlet-I) has little impact on gene expression.  
153 Measured levels of mCerulean appear slightly higher (~15%) in the 3-color strain compared to the single-

154 color strain. This could be caused by residual errors in the deconvolution, exacerbated by the low  
 155 brightness of mCerulean compared to autofluorescence and to mNeonGreen.

156 Finally, to validate the optogenetic capabilities of the platform, we built and characterized a light-inducible  
 157 gene expression circuit based on the EL222 system<sup>16</sup> (Figure 2D). As expected, applying different ON-OFF  
 158 temporal patterns of blue light resulted in dynamic profiles of fluorophore levels covering a wide range,  
 159 from near-zero levels (i.e., hardly distinguishable from auto-fluorescence) to levels exceeding those  
 160 obtained with the strong constitutive promoter pTDH3. Cell-to-cell variability in expression levels at high  
 161 induction is also low, with coefficient of variation (CV) values comparable to the pTDH3 promoter (0.22 vs  
 162 0.20).

163

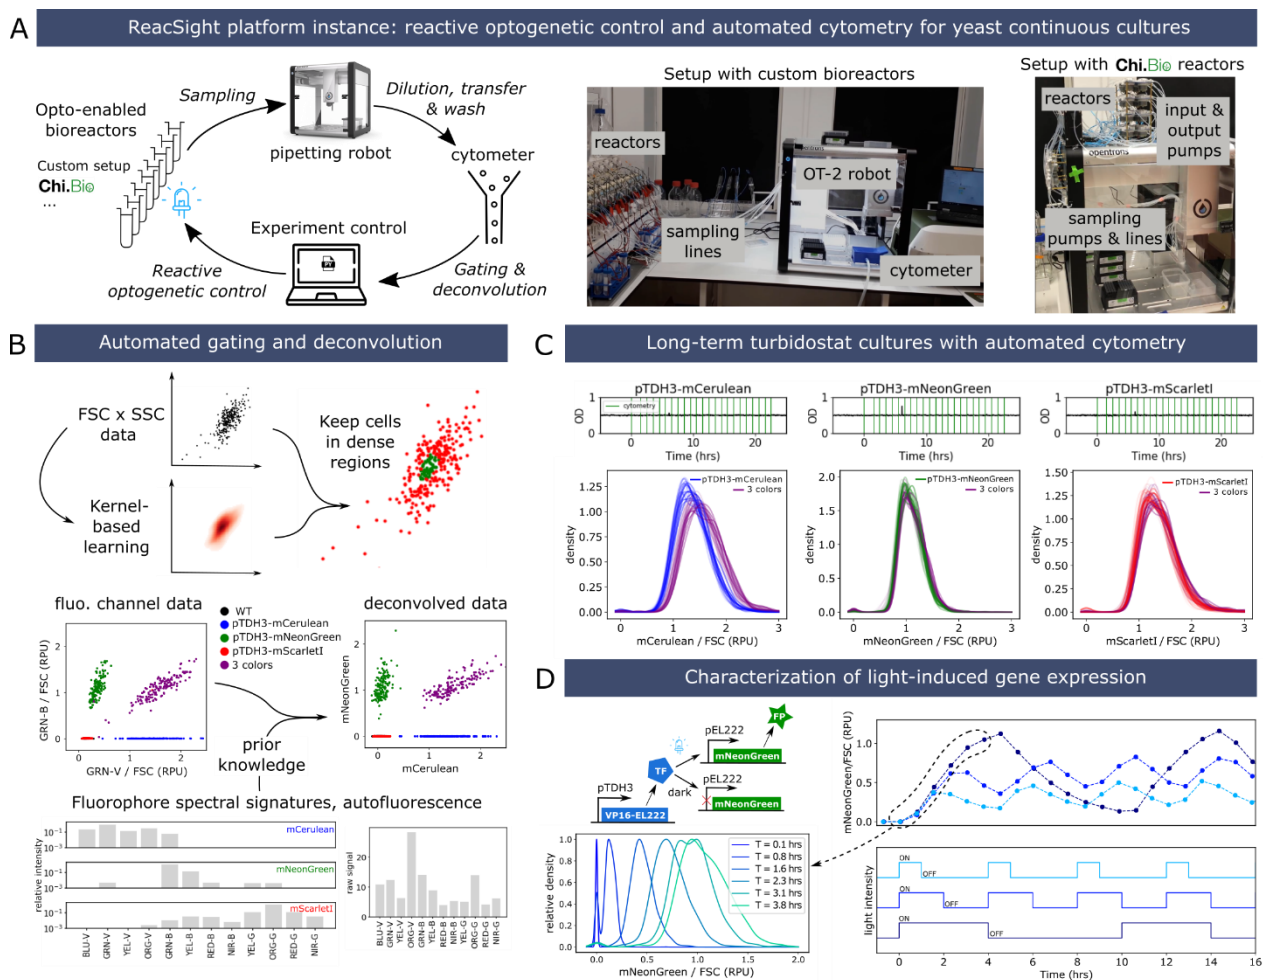

164  
 165 **Figure 2. ReacSight-based assembly of a fully automated platform enabling reactive optogenetic control and single-cell resolved**  
 166 **characterization of yeast continuous cultures.** (A) Platform overview. The Opentrons OT-2 pipetting robot is used to connect  
 167 optogenetic-ready multi-bioreactors to a benchtop cytometer (Guava EasyCyte 14HT, Luminex). The robot is used to dilute fresh  
 168 culture samples in the cytometer input plate and to wash it between timepoints. The ‘clicking’ python library pyautogui is used to  
 169 create the cytometer instrument control API. Custom algorithms were developed and implemented in python to automatically gate  
 170 and deconvolve cytometry data on the fly. Two versions of the platform were assembled, using either a custom bioreactor setup  
 171 (left photos) or Chi.Bio reactors<sup>4</sup> (right photo). (B) Description of the gating and deconvolution algorithm. As an example,  
 172 deconvolution between the overlapping fluorophores mCerulean and mNeonGreen are shown. (C) Stability of single-cell gene  
 173 expression distributions over many generations. Strains constitutively expressing either mCerulean, mNeonGreen or mScarlet-I  
 174 alone or altogether (‘3-colors’ strain) from the transcriptional units driven by the pTDH3 promoter and integrated in the

175 *chromosome were grown in turbidostat mode (OD setpoint = 0.5, upper plots) and cytometry was acquired hourly (vertical green*  
176 *lines). Distributions (smoothed via Gaussian kernel density estimation) of fluorophore levels (after gating, deconvolution, and*  
177 *normalization by the forward scatter, FSC) for all timepoints are plotted together with different color shades (bottom). RPU: relative*  
178 *promoter units (see Methods). (D) Characterization of a light-driven gene expression circuit based on the EL222 system<sup>16</sup>. Three*  
179 *different ON-OFF blue light temporal profiles were applied (bottom) and cytometry was acquired every 45 minutes. The median of*  
180 *gated, deconvolved, FSC-normalized data is shown (top). All bioreactor experiments presented in this figure were performed in*  
181 *parallel, the same day, with the custom bioreactor platform version.*

182 The first platform we assembled used a pre-existing, custom optogenetic-enabled bioreactor array  
183 (Supplementary Text S1.2.1). This setup has several advantages (reliability, wide range of working  
184 volumes) but cannot be replicated easily by other labs. Thanks to the modularity of the ReacSight  
185 architecture, we could quickly construct a second version of the platform with similar capabilities by  
186 exchanging this custom bioreactor array with an array of the recently described, open-hardware,  
187 optogenetic-ready, commercially available Chi.Bio<sup>4</sup> bioreactors (Figure 2A, right photo, Supplementary  
188 Text S1.2.2). To validate the performance of this other version of the platform, we performed optogenetic  
189 induction experiments with the same strain as in Figure 2D and obtained excellent reactor-to-reactor  
190 reproducibility for various light induction profiles (Figure 6B in Supplementary Text S1).

### 191 Real-time control of gene expression using light

192 To showcase the reactive optogenetic control capabilities of the platform, we set out to dynamically adapt  
193 light stimulation so as to maintain fluorophore levels at different target setpoints. Such in-silico feedback  
194 for in-vivo regulation of gene expression is useful to dissect the functioning of endogenous circuits in the  
195 presence of complex cellular regulations and could facilitate the use of synthetic systems for  
196 biotechnological applications<sup>6,10,17</sup>.

197 We first constructed and validated a simple mathematical model of light-induced gene expression (Figure  
198 3A). Joint fitting of the three model parameters to the characterization data of Figure 2D resulted in an  
199 excellent quantitative agreement. This is remarkable given the simplicity of the model assumptions:  
200 constant rate of mRNA production under light activation, constant translation rate per mRNA, and first-  
201 order decay for mRNA (mainly degradation, half-life of 20 minutes) and protein (mostly dilution, half-life  
202 of 1.46 hours). Therefore, when experimental conditions are well-controlled and the data is properly  
203 processed, one can hope to quantitatively explain the behavior of biological systems with a small set of  
204 simple processes. We then incorporated the fitted model into a model-predictive control algorithm (Figure  
205 3B). Together with the ReacSight event system, this algorithm enabled accurate real-time control of  
206 fluorophore levels to different targets in different reactors in parallel (Figure 3C).

### 207 Exploring the impact of nutrient scarcity on fitness and cellular stress

208 Fluorescent proteins can be used as reporters to assess phenotypic traits of cells or as barcodes to label  
209 strains with specific genotypes<sup>18</sup>. Together with automated cytometry from bioreactor arrays, this  
210 capability unlocks a new class of experiments: multiplexed strain characterization and competition in  
211 dynamically controlled environments (Figure 4A). Indeed, some fluorescent proteins can be used for  
212 genotyping and others for phenotyping. Automated cytometry (including raw data analysis) will then  
213 provide quantitative information on both the competition dynamics between the different strains and cell  
214 state distribution dynamics for each strain. Depending on the goal of the experiment, this rich information  
215 can be fed back to experiment control to adapt environmental parameters for each reactor.

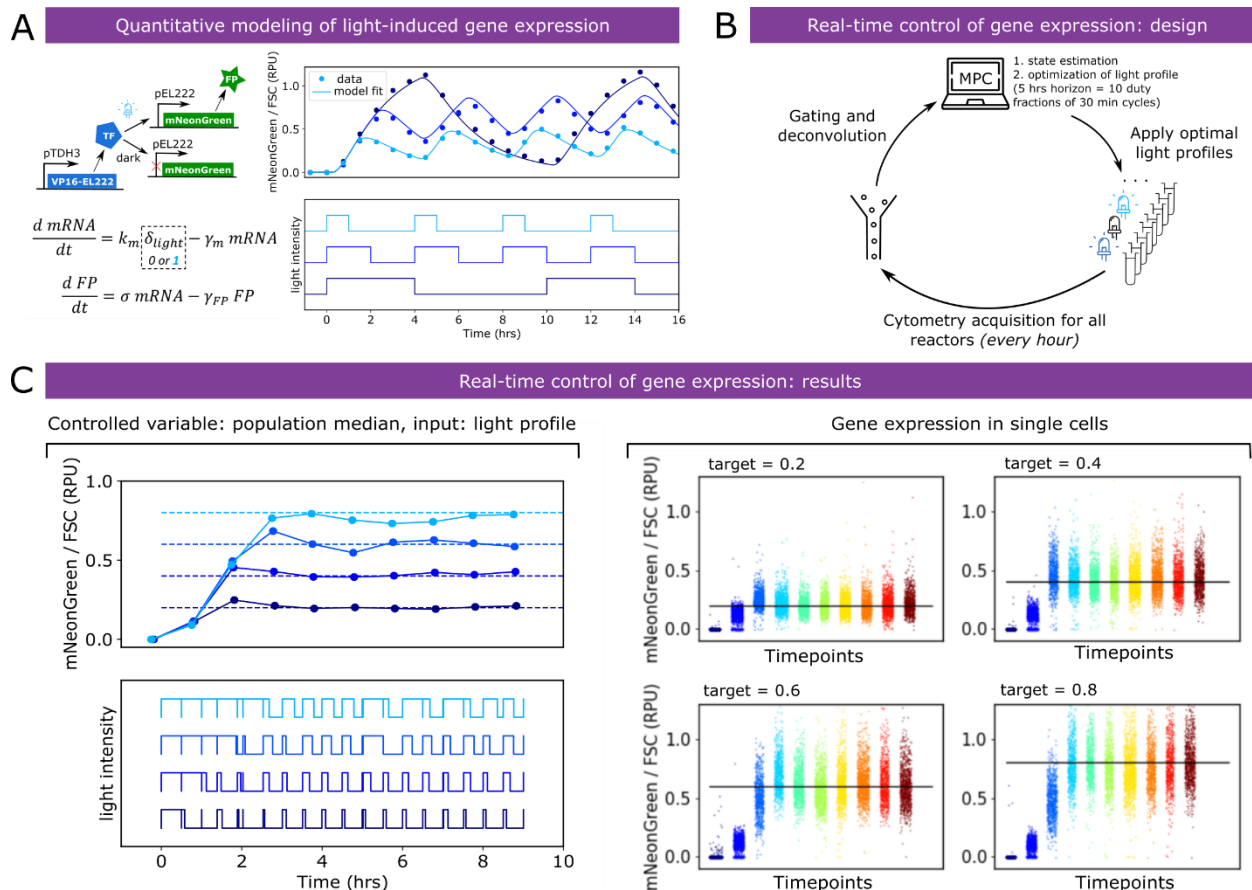

216  
 217 **Figure 3. Closing the loop: real-time control of gene expression using light.** (A) A simple ODE model of the light-driven gene  
 218 expression circuit is fitted to the characterization data of Figure 2D. Fitted parameters are  $\gamma_m = 2.09 \text{ hr}^{-1}$ ,  $\sigma = 0.64 \text{ RPU} \cdot \text{hr}^{-1}$   
 219 and  $\gamma_{FP} = 0.475 \text{ hr}^{-1}$ .  $k_m$  was arbitrarily set to equal  $\gamma_m$  to allow parameter identifiability from protein median levels only. (B)  
 220 Description of real-time control of gene expression experiments. Every hour, cytometry acquisition is performed, and after gating,  
 221 deconvolution and FSC-normalization the data is fed to a model-predictive control (MPC) algorithm. The algorithm uses the model  
 222 to search for the best sequence of duty fractions for 10 duty cycles of period 30 minutes (i.e. a horizon of 5 hours) in order to track  
 223 the target level. (C) Real-time control results for four different target levels, performed in parallel in different bioreactors (custom  
 224 setup). Left: median of single cells (controlled value). Right: single-cell distributions over time. Note that a linear scale is used on  
 225 all plots.

226 As a first proof of concept that such experiments can be carried out, we set out to explore the impact of  
 227 nutrient scarcity on fitness and cellular stress (Figure 4B, top-left). Different species in microbial  
 228 communities have different nutritional needs depending on their metabolic diversity or specialization, and  
 229 their fitness therefore depends not only on external environmental factors but also on the community  
 230 itself through nutrient consumption, metabolite release, and other inter-cellular couplings<sup>19,20</sup>. As opposed  
 231 to competition assays in batch, continuous culture allows to control for such factors. For example, in  
 232 turbidostat cultures, nutrient availability depends on both nutrient supply (i.e. nutrient levels in the input  
 233 medium) and nutrient consumption by cells (which primarily depends on the OD setpoint). We used  
 234 histidine auxotrophy as a model for nutrient scarcity: for his3 mutant cells, histidine is an essential  
 235 nutrient. By competing his3 mutant cells with wild-type cells at different OD setpoints and different  
 236 histidine concentrations in the feeding medium, we can measure how nutrient scarcity affects fitness  
 237 (Figure 4B, top-right). Using a stress reporter in both strains also informs about the relationship between  
 238 fitness and cellular stress in the context of nutrient scarcity. We focused on the UPR (Unfolded Protein

239 Response<sup>21</sup>) stress response to investigate whether nutrient stress can lead to other, a priori unrelated  
 240 types of stress, which will be indicative of global couplings in cell physiology.

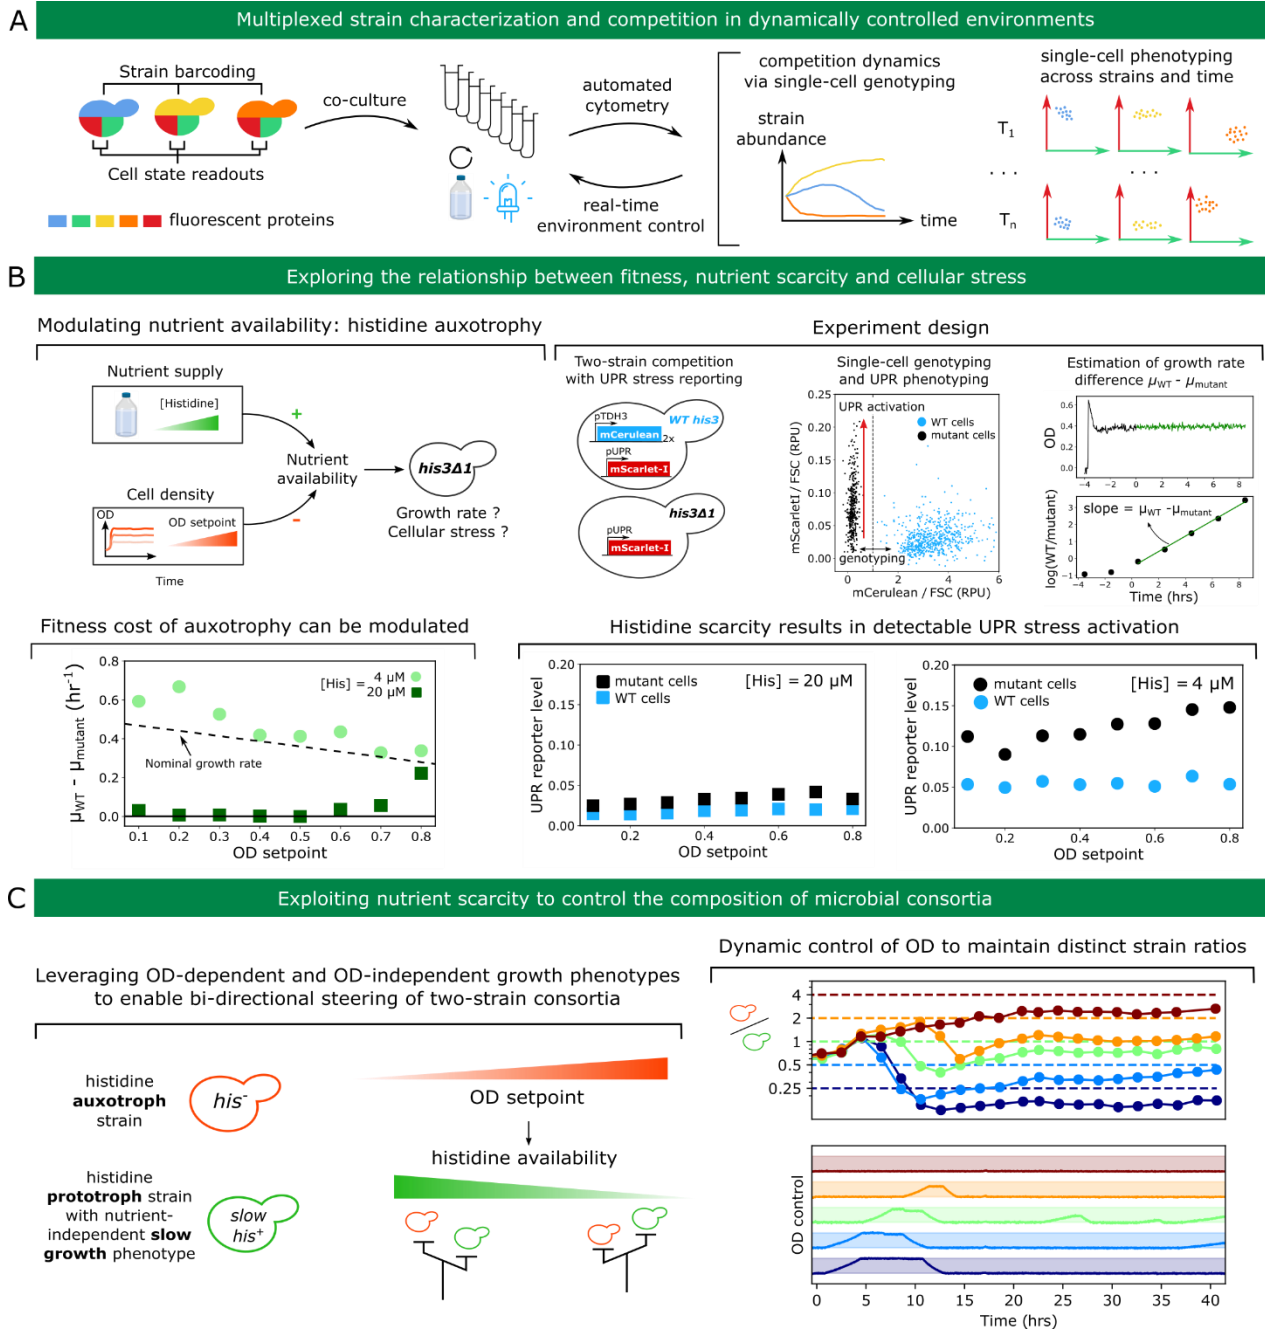

241  
 242 **Figure 4. Exploring and exploiting the relationship between fitness, nutrient scarcity and cellular stress.** (A) Opening up a new  
 243 class of experiments by combining co-cultures, automated cytometry for single-cell genotyping and phenotyping and reactive  
 244 experiment control to adapt environmental conditions in real-time. (B) Top-left: the availability of essential nutrients (such as  
 245 histidine for his3 mutant strains) depends on the environmental supply but also on cell density via nutrient consumption. Low  
 246 nutrient availability will impede growth rate and might trigger cellular stress. Top-right: experiment design. Wild-type cells (marked  
 247 with mCerulean constitutive expression) are co-cultured with his3 mutant cells. Both strains harbor a UPR stress reporter construct  
 248 driving expression of mScarllet-I. Automated cytometry enables to assign single cells to their genotype and to monitor strain-specific  
 249 UPR activation. The dynamics of the relative amount of the two strains allows inference of the growth rate difference between  
 250 mutant and wild-type cells for each condition. Bottom-left: cell density dependence of the fitness deficit of mutant cells at two  
 251 different media histidine concentration. The dashed line indicates the approximate dependence of wild-type growth rate on the



252 *OD setpoint. Bottom-right: strain-specific UPR activation for each condition. (C) Left: principle for a two-strain consortium whose*  
253 *composition can be steered using control of OD. Right: implementation and demonstration. The secretion of a heterologous*  
254 *difficult-to-fold protein is used as a nutrient-independent slow growth phenotype. Dynamic control of the OD setpoint is performed*  
255 *using model-predictive control and the ReacSight event system, similarly to Figure 3B (see Methods). We note the presence of a*  
256 *slight steady-state error, that might originate from a slightly lower long-term growth defect of the secreting strain compared to*  
257 *the estimate based on shorter-term characterization data.*

258 At a histidine concentration of 4  $\mu\text{M}$ , his3 mutant cells are strongly outcompeted by wild-type cells over  
259 the range of OD setpoints (0.1 – 0.8) we considered (Figure 4B, bottom-left). This is not the case anymore  
260 at a concentration of 20  $\mu\text{M}$ . At this concentration, the growth rate advantage of wild-type cells is close  
261 to zero below an OD setpoint of 0.6 (the remaining histidine is sufficient for his3 mutant cells to grow  
262 normally) and becomes larger than 0.2  $\text{hr}^{-1}$  at the largest OD setpoint of 0.8 (the remaining histidine is too  
263 low and limits growth of his3 mutant cells). Therefore, for this level of nutrient supply, levels of nutrient  
264 consumption by cells have a strong impact on fitness of his3 mutant cells. This qualitative change between  
265 4  $\mu\text{M}$  and 20  $\mu\text{M}$  is highly consistent with the reported value of 17  $\mu\text{M}$  for the  $K_m$  constant of the single  
266 high-affinity transporter of histidine, HIP1<sup>22</sup>. Also, because the growth rate difference between wild-type  
267 and mutant cells for a histidine concentration of 4  $\mu\text{M}$  is close or even exceeds the typically observed  
268 growth rate of wild-type cells (between 0.3 and 0.45  $\text{hr}^{-1}$  depending on the OD setpoint), we conclude that  
269 mutant cells are fully growth-arrested in these conditions. UPR data shows little difference between  
270 mutant and wild-type cells across all OD setpoints for a histidine concentration of 20  $\mu\text{M}$  but a clear  
271 activation of the UPR response in mutant cells at a histidine concentration of 4  $\mu\text{M}$  (Figure 4B, bottom-  
272 right). Therefore, seemingly similar growth phenotypes (such as mutant cells at OD 0.8 for 4 and 20  $\mu\text{M}$ )  
273 can correspond to different physiological states (as revealed by differences in UPR activation).

274 Finally, to showcase reactive control of the environment informed by strain abundance data, we set out  
275 to dynamically control the ratio of two strains. Taking control over the composition and heterogeneity of  
276 microbial cultures is anticipated to enable more efficient bioprocessing strategies<sup>23</sup>. We reasoned that the  
277 OD of the culture could be used as a steering knob when one of the two strain is auxotroph for histidine.  
278 Indeed, the strong OD-dependence of the histidine biosynthesis mutant growth rate at a medium histidine  
279 concentration of 20  $\mu\text{M}$  (Figure 4B, bottom left) means that switching the OD setpoint of turbidostat  
280 cultures can be used to dynamically control its growth rate. In addition, if such strain is co-cultured with a  
281 strain prototroph for histidine but growing slower in an OD-independent manner, bi-directional steering  
282 of the two strains ratio can be achieved (Figure 4C, left). We built such strain by leveraging burdensome  
283 heterologous protein secretion. We then constructed a simple model to predict the (steady-state) growth  
284 rate difference with the histidine auxotroph strain (see Methods). Using this model for model-predictive  
285 control and the ReacSight event system, we could maintain distinct ratios of the two strains in parallel  
286 bioreactors (Figure 4C, right) in a fully automated fashion.

## 287 Discussion

288 We report the development of ReacSight, a strategy to enhance multi-bioreactor setups with automated  
289 measurements and reactive experiment control. ReacSight addresses an unmet need by allowing  
290 researchers to combine the recent advances in low-cost, open-hardware instruments for continuous  
291 cultures of microbes (e.g. eVOLVER, Chi.Bio<sup>3,4</sup>) and multi-purpose, modular, programmable pipetting  
292 robots (e.g. Opentrons OT-2) with sensitive, but generally expensive, stand-alone instruments to build fully  
293 automated platforms that open up radically novel experimental capabilities. ReacSight is generic and easy  
294 to deploy, and should be broadly useful for the microbial systems biology and synthetic biology  
295 communities. While we deployed the ReacSight strategy for only one measurement device (a benchtop

296 cytometer), it should be possible to position two devices on each side of the pipetting robot to enable  
297 even more advanced workflows.

298 As already noted by Wong and colleagues<sup>3</sup>, connecting a multi-bioreactor setup to a cytometer for  
299 automated measurements could enable single-cell resolved characterization of microbial cultures across  
300 time. Automated cytometry in the context of microbial systems and synthetic biology has in fact already  
301 been demonstrated years ago by a small number of labs<sup>6,13,24</sup>, but low throughput or reliance on expensive  
302 automation equipment likely prevented a wider adoption of this technology. Automated cytometry from  
303 continuous cultures becomes especially powerful in combination with recently developed optogenetic  
304 systems<sup>25,26</sup>, enabling targeted, rapid and cost-effective control over cellular processes<sup>13</sup>. We used  
305 ReaSight to connect two distinct bioreactor setups (our own, pre-existing custom setup and the recent  
306 Chi.Bio<sup>4</sup> optogenetic-ready bioreactors) with a cytometer. This demonstrate the modularity of the  
307 ReaSight strategy, and the platform version using Chi.Bio bioreactors illustrates how other labs lacking  
308 pre-existing bioreactor setups could build such platform at a small time and financial cost (excluding the  
309 cost of the cytometer, which are expensive but already widespread in labs given their broad usefulness  
310 even in absence of automation). We demonstrated the key capabilities of such platform by performing, in  
311 a fully automated fashion and in different reactors in parallel, 1) light-driven real-time control of gene  
312 expression; 2) cell-state informing competition assays in tightly controlled environmental conditions; and  
313 3) dynamic control of the ratio between two strains.

314 Still, we only touched the surface of the large space of potential applications offered by such platforms.  
315 Strain barcoding can be scaled up to 20 strains with 2 fluorophores and even to 100 strains with 3  
316 fluorophores as recently demonstrated using ribosomal frameshifting<sup>18</sup>. Such multiplexing capabilities can  
317 be especially useful to characterize the input-output response of various candidate circuits (or the  
318 dependence of circuit behavior across a library of strain backgrounds) in parallel (using different light  
319 inductions across reactors). Immuno-beads can be used for more diverse cytometry-based measurements  
320 (the robot enabling automated incubation and wash, for example using the Opentrons OT-2 magnetic  
321 module). Technologies such as surface display<sup>27,28</sup> or GPCR signaling<sup>29</sup> can also be used to engineer  
322 biosensor strains to measure even more dimensions of the cultures with a single cytometer and at no  
323 reagent costs. Aside of high-performance quantitative strain characterization, such platforms can be useful  
324 for biotechnological applications<sup>10</sup>. Automated cytometry informing on the composition of artificial  
325 microbial consortia together with dynamic control of culture conditions (as demonstrated here using  
326 histidine auxotrophy and OD) could strongly reduce the need to engineer robust coexistence  
327 mechanisms<sup>30</sup>, therefore enabling the use of a much larger diversity of consortia.

328 In the future we hope that many ReaSight-based platforms will be assembled and their design shared by  
329 a broad community to drastically expand our experimental capabilities, in order to shed new light on  
330 fundamental questions in microbiology or to unlock the potential of synthetic biology in biotechnological  
331 applications.

## 332 **Methods**

333 *Cloning and strain construction.* All integrative plasmids are constructed using the modular cloning  
334 framework for yeast synthetic biology Yeast Tool Kit by Lee and colleagues<sup>31</sup> and all strains originate from  
335 the common laboratory strain BY4741. Strain genotypes are described in Table 1 of Text S1.3, and maps  
336 of the corresponding integrative plasmids are available [online](#). All strains used in this work express the  
337 light-inducible transcription factor EL222 from the *URA3* locus (transcriptional unit: pTDH3 NLS-VP16-

338 EL222 tSSA1, common parental strain yIB32). Single-color constitutive expression strains (Figure 2) also  
339 harbor a pTDH3 FP tTDH1 transcriptional unit at the *LEU2* locus where FP is mCerulean, mNeonGreen or  
340 mScarlet-I. Corresponding CDS have been codon-optimized for expression in *S. cerevisiae*. The three-color  
341 strain harbors the same three transcriptional units in tandem (order: mCerulean, mNeonGreen, mScarlet-  
342 I) at the *LEU2* locus. The autofluorescence strain harbors an empty cassette at the *LEU2* locus to match  
343 auxotrophy markers between strains. For light-inducible gene expression (Figure 2 and 3), a pEL222  
344 mNeonGreen tTDH1 transcriptional unit (where pEL222 is composed of 5 copies of the EL222 binding site  
345 followed by a truncated CYC1 promoter, originally named 5xBS-CYC180pr<sup>16</sup>) is integrated at the *LEU2* locus.  
346 For the histidine competition experiments (Figure 4B), the histidine mutant strain (yIB90, parental strain  
347 yIB32) expresses a pUPR mScarlet-I tENO1 transcriptional unit integrated at the *LEU2* locus to report on  
348 the UPR activation. The pUPR promoter consists in 4 copies of a consensus UPR element<sup>32</sup> followed by a  
349 truncated CYC1 promoter. The histidine wild-type strain was obtained from the mutant strain yIB90 by  
350 integrating two identical pTDH3 mCerulean tTDH1 transcriptional units in tandem at the *HO* locus with  
351 *HIS3* selection, thereby restoring histidine prototrophy and enabling fluorescent barcoding. For the two-  
352 strain consortium experiment (Figure 4C), the slow-growth histidine prototroph strain was obtained by  
353 integrating three identical pEL222 alpha-prepro scFv 4-4-20 tTDH1 (burdensome secretion of an anti-  
354 fluorescein single chain antibody fragment<sup>33</sup>) transcriptional units in tandem at the *HO* locus (*HIS3*  
355 selection) into yIB90 and blue light was used to induce the slow growth phenotype.

356 *Cell culture conditions.* All experiments were performed in 30 mL culture volume bioreactors (cf Text S1.2)  
357 at 30 degrees and in turbidostat mode (OD 0.5, typically corresponding to 10<sup>7</sup> cells/mL according to  
358 cytometry data) with synthetic complete medium (ForMedium LoFlo yeast nitrogen base CYN6510 and  
359 Formedium complete supplement mixture DCS0019) except for histidine competition experiment where  
360 histidine drop-out amino-acid mixture was used (Sigma Y1751) and complemented with desired levels of  
361 histidine (Sigma 53319).

362 *Cytometry acquisition and raw data analysis.* Gain settings of our cytometer (*Guava EasyCyte 14HT*,  
363 *Luminex*) for all channels were set once and for all prior to the study such that yeast auto-fluorescence  
364 under our typical growth conditions is detectable but at the lower end of the instrument 5-decade range.  
365 We verified that cytometry data was reproducible week-to-week with those fixed settings. Single-color  
366 strains described above were used together with the autofluorescence control strain to obtain ‘spectral’  
367 signatures of the three fluorophores *mCerulean*, *mNeonGreen* and *mScarlet-I* and autofluorescence levels  
368 for each channel. These signatures were also highly reproducible week-to-week (Figure 7A, Text S1.2). To  
369 convert raw cytometry data into fluorophore concentrations in relative promoter units (*RPU*<sup>34</sup>), we used a  
370 pipeline described in Text S2.2. In essence, it uses data from single-color strains with pTDH3-driven  
371 expression for normalization. This pipeline was implemented in *python* (mainly using NumPy<sup>35</sup> functions)  
372 and is available in the *ReacSight* Git [repository](#).

373 *Model-predictive control.* For real-time control of gene expression using light (Figure 3), model-predictive  
374 control using the two-variables, three-parameters ODE model described in Figure 3A was used. For state  
375 estimation upon arrival of cytometry data, the *FP* estimate was set equal to the fluorescence measurement  
376 (median of gated, deconvolved data) and the *mRNA* estimate was simply an ‘open-loop’ estimate based  
377 on simulating the history of light induction. This first state estimate corresponds to the state of the system  
378 at the time of sampling. To account for the time interval (and the concomitant light induction profile)  
379 between the sampling time and the data arrival time (typically 10-15 minutes), the model was used to  
380 obtain the corresponding updated state estimate. Then, a multi-dimensional, bounded, gradient-based

381 search using SciPy<sup>36</sup> was used to find the best set of next light duty cycles minimizing the model-predicted  
382 distance to the target value over an horizon of 5 hours (10 duty cycles). The corresponding code is available  
383 in the *ReacSight* Git [repository](#).

384 *Histidine competition assays*. Pre-cultures were performed in synthetic complete medium. Cells were  
385 washed in the same low histidine medium as the one used for turbidostat feeding of the competition  
386 culture and mixed with an approximate ratio mutant:WT of 5:1 (to ensure good statistics for long enough  
387 even when the mutant fitness is very low) before inoculation. Cytometry was acquired automatically every  
388 2 hours. At steady-state, the ratio between two competitors in a co-culture evolves exponentially at a rate  
389 equals to their growth rate difference. Linearity of the ratio logarithm for at least 3 timepoints was  
390 therefore used to assess when steady-state is reached. A threshold of 1 *mCerulean RPU* was used to assign  
391 each cell to its genotype. Size gating was performed as described in Text 2.2 (parameters: size threshold =  
392 0.5 and doublet threshold = 0.5, less stringent than for experiments of Figure 2 and 3) to discard dead or  
393 dying cells.

394 *Dynamic control of the two-strain consortium*. A simple sigmoidal model describing the steady-state  
395 growth rate difference between the two strains as a function of OD was fitted on previous characterization  
396 data corresponding to different OD setpoints. Every two hours, cytometry data was automatically  
397 acquired. To assign a genotype to each cytometry event, the combined GRN-B and ORG-G channels was  
398 used (the histidine auxotroph strain being GRN-B positive and ORG-G negative). Based on the resulting  
399 estimate of the two-strain ratio, the model was used to optimize a vector of future OD setpoints (changing  
400 every 2 hours for the next 10 hours) using SciPy<sup>36</sup>.

## 401 References

- 402 1. Toprak, E. *et al.* Evolutionary paths to antibiotic resistance under dynamically sustained drug selection.  
403 *Nat. Genet.* **44**, 101–105 (2012).
- 404 2. Takahashi, C. N., Miller, A. W., Ekness, F., Dunham, M. J. & Klavins, E. A Low Cost, Customizable  
405 Turbidostat for Use in Synthetic Circuit Characterization. *ACS Synth. Biol.* **4**, 32–38 (2015).
- 406 3. Wong, B. G., Mancuso, C. P., Kiriakov, S., Bashor, C. J. & Khalil, A. S. Precise, automated control of  
407 conditions for high-throughput growth of yeast and bacteria with eVOLVER. *Nat. Biotechnol.* **36**, 614–  
408 623 (2018).
- 409 4. Steel, H., Habgood, R., Kelly, C. & Papachristodoulou, A. In situ characterisation and manipulation of  
410 biological systems with Chi.Bio. *PLOS Biol.* **18**, e3000794 (2020).
- 411 5. Toettcher, J. E., Gong, D., Lim, W. A. & Weiner, O. D. Light-based feedback for controlling intracellular  
412 signaling dynamics. *Nat. Methods* **8**, 837–839 (2011).
- 413 6. Miliadis-Argeitis, A. *et al.* In silico feedback for in vivo regulation of a gene expression circuit. *Nat.*  
414 *Biotechnol.* **29**, 1114–1116 (2011).
- 415 7. Harrigan, P., Madhani, H. D. & El-Samad, H. Real-Time Genetic Compensation Defines the Dynamic  
416 Demands of Feedback Control. *Cell* **175**, 877–886.e10 (2018).
- 417 8. Lugagne, J.-B. & Dunlop, M. J. Cell-machine interfaces for characterizing gene regulatory network  
418 dynamics. *Curr. Opin. Syst. Biol.* **14**, 1–8 (2019).
- 419 9. Fedorec, A. J. H., Karkaria, B. D., Sulu, M. & Barnes, C. P. Single strain control of microbial consortia.  
420 *bioRxiv* 2019.12.23.887331 (2020) doi:10.1101/2019.12.23.887331.
- 421 10. Pouzet, S. *et al.* The Promise of Optogenetics for Bioproduction: Dynamic Control Strategies and  
422 Scale-Up Instruments. *Bioengineering* **7**, 151 (2020).
- 423 11. Zhong, Z. *et al.* Automated Continuous Evolution of Proteins in Vivo. *ACS Synth. Biol.* **9**, 1270–1276  
424 (2020).

- 425 12. Bandiera, L. *et al.* On-Line Optimal Input Design Increases the Efficiency and Accuracy of the  
426 Modelling of an Inducible Synthetic Promoter. *Processes* **6**, 148 (2018).
- 427 13. Miliadis-Argeitis, A., Rullan, M., Aoki, S. K., Buchmann, P. & Khammash, M. Automated optogenetic  
428 feedback control for precise and robust regulation of gene expression and cell growth. *Nat. Commun.*  
429 **7**, 12546 (2016).
- 430 14. Melendez, J. *et al.* Real-time optogenetic control of intracellular protein concentration in microbial  
431 cell cultures. *Integr. Biol.* **6**, 366–372 (2014).
- 432 15. Chory, E. J., Gretton, D. W., DeBenedictis, E. A. & Esvelt, K. M. Enabling high-throughput biology  
433 with flexible open-source automation. *Mol. Syst. Biol.* **17**, e9942 (2021).
- 434 16. Benzinger, D. & Khammash, M. Pulsatile inputs achieve tunable attenuation of gene expression  
435 variability and graded multi-gene regulation. *Nat. Commun.* **9**, 3521 (2018).
- 436 17. Chait, R., Ruess, J., Bergmiller, T., Tkačik, G. & Guet, C. C. Shaping bacterial population behavior  
437 through computer-interfaced control of individual cells. *Nat. Commun.* **8**, 1535 (2017).
- 438 18. Anzalone, A. V., Jimenez, M. & Cornish, V. W. FRAME-tags: genetically encoded fluorescent  
439 markers for multiplexed barcoding and time-resolved tracking of live cells. *bioRxiv* 2021.04.09.436507  
440 (2021) doi:10.1101/2021.04.09.436507.
- 441 19. Ghoul, M. & Mitri, S. The Ecology and Evolution of Microbial Competition. *Trends Microbiol.* **24**,  
442 833–845 (2016).
- 443 20. Friedman, J. & Gore, J. Ecological systems biology: The dynamics of interacting populations. *Curr.*  
444 *Opin. Syst. Biol.* **1**, 114–121 (2017).
- 445 21. Travers, K. J. *et al.* Functional and Genomic Analyses Reveal an Essential Coordination between  
446 the Unfolded Protein Response and ER-Associated Degradation. *Cell* **101**, 249–258 (2000).
- 447 22. Bajmoczy, M., Sneve, M., Eide, D. J. & Drewes, L. R. TAT1 Encodes a Low-Affinity Histidine  
448 Transporter in *Saccharomyces cerevisiae*. *Biochem. Biophys. Res. Commun.* **243**, 205–209 (1998).
- 449 23. Delvigne, F. *et al.* Taking control over microbial populations: Current approaches for exploiting  
450 biological noise in bioprocesses. *Biotechnol. J.* **12**, 1600549 (2017).
- 451 24. Zuleta, I. A., Aranda-Díaz, A., Li, H. & El-Samad, H. Dynamic characterization of growth and gene  
452 expression using high-throughput automated flow cytometry. *Nat. Methods* **11**, 443–448 (2014).
- 453 25. Liu, Z. *et al.* Programming Bacteria With Light—Sensors and Applications in Synthetic Biology.  
454 *Front. Microbiol.* **9**, (2018).
- 455 26. Figueroa, D., Rojas, V., Romero, A., Larrondo, L. F. & Salinas, F. The rise and shine of yeast  
456 optogenetics. *Yeast* yea.3529 (2020) doi:10.1002/yea.3529.
- 457 27. Park, M. Surface Display Technology for Biosensor Applications: A Review. *Sensors* **20**, 2775 (2020).
- 458 28. Shibasaki, S., Tanaka, A. & Ueda, M. Development of combinatorial bioengineering using yeast cell  
459 surface display—order-made design of cell and protein for bio-monitoring. *Biosens. Bioelectron.* **19**,  
460 123–130 (2003).
- 461 29. Shaw, W. M. *et al.* Engineering a Model Cell for Rational Tuning of GPCR Signaling. *Cell* **177**, 782-  
462 796.e27 (2019).
- 463 30. Kong, W., Meldgin, D. R., Collins, J. J. & Lu, T. Designing microbial consortia with defined social  
464 interactions. *Nat. Chem. Biol.* **14**, 821–829 (2018).
- 465 31. Lee, M. E., DeLoache, W. C., Cervantes, B. & Dueber, J. E. A Highly Characterized Yeast Toolkit for  
466 Modular, Multipart Assembly. *ACS Synth. Biol.* **4**, 975–986 (2015).
- 467 32. Pincus, D. *et al.* BiP Binding to the ER-Stress Sensor Ire1 Tunes the Homeostatic Behavior of the  
468 Unfolded Protein Response. *PLoS Biol.* **8**, e1000415 (2010).
- 469 33. Boder, E. T., Midelfort, K. S. & Wittrup, K. D. Directed evolution of antibody fragments with  
470 monovalent femtomolar antigen-binding affinity. *Proc. Natl. Acad. Sci. U. S. A.* **97**, 10701–10705 (2000).
- 471 34. Kelly, J. R. *et al.* Measuring the activity of BioBrick promoters using an in vivo reference standard.  
472 *J. Biol. Eng.* **3**, 4 (2009).

- 473 35. Harris, C. R. *et al.* Array programming with NumPy. *Nature* **585**, 357–362 (2020).  
474 36. SciPy 1.0: fundamental algorithms for scientific computing in Python | Nature Methods.  
475 <https://www.nature.com/articles/s41592-019-0686-2>.  
476

## 477 Acknowledgments

478 The authors would like to thanks Cosmin Saveanu, Emmanuel Frachon and Alain Jacquier for the gift of the  
479 16-vessel custom bioreactor setup and for guidance regarding its functioning, enabling us to customize  
480 and modernize it even further. We also received guidance and help from Albane Imbert (heading the  
481 Institut Pasteur *Fab Lab*) for the custom design and fabrication of Plexiglas and 3D-printed pieces.

## 482 Author contributions

483 F.B., S.S-C and G.B conceived the study. F.B. performed software and hardware engineering, performed  
484 experiments, analyzed data, and developed mathematical models. S.S.-C. developed strains with help of  
485 M.F, performed experiments with help of C.A., and analyzed data. A.F. helped with software and hardware  
486 developments. F.B. and G.B. supervised the study. F.B., S.S-C and G.B wrote the manuscript with input  
487 from all authors.

## 488 Funding

489 This work was supported by ANR grants CyberCircuits (ANR-18-CE91-0002), MEMIP (ANR-16-CE33-0018),  
490 and COGEX (ANR-16-CE12-0025), by the H2020 Fet-Open COSY-BIO grant (grant agreement no. 766840)  
491 and by the Inria IPL grant COSY.

## 492 Competing interests

493 The authors declare no competing interests.
